# Supplementary material for: A Genome-Wide Analysis of the Chloroplast NADH Dehydrogenase-like Complex in Zostera Marina: Identification, Splicing, Editing and Profiles of Expression
Source: Research Square preprint supplement (doi:10.21203/rs.3.rs-99774/v1), 2020-11-09
Supplement: Supplementary file 1 [file 81f3e1371324331e03368f7d.docx]

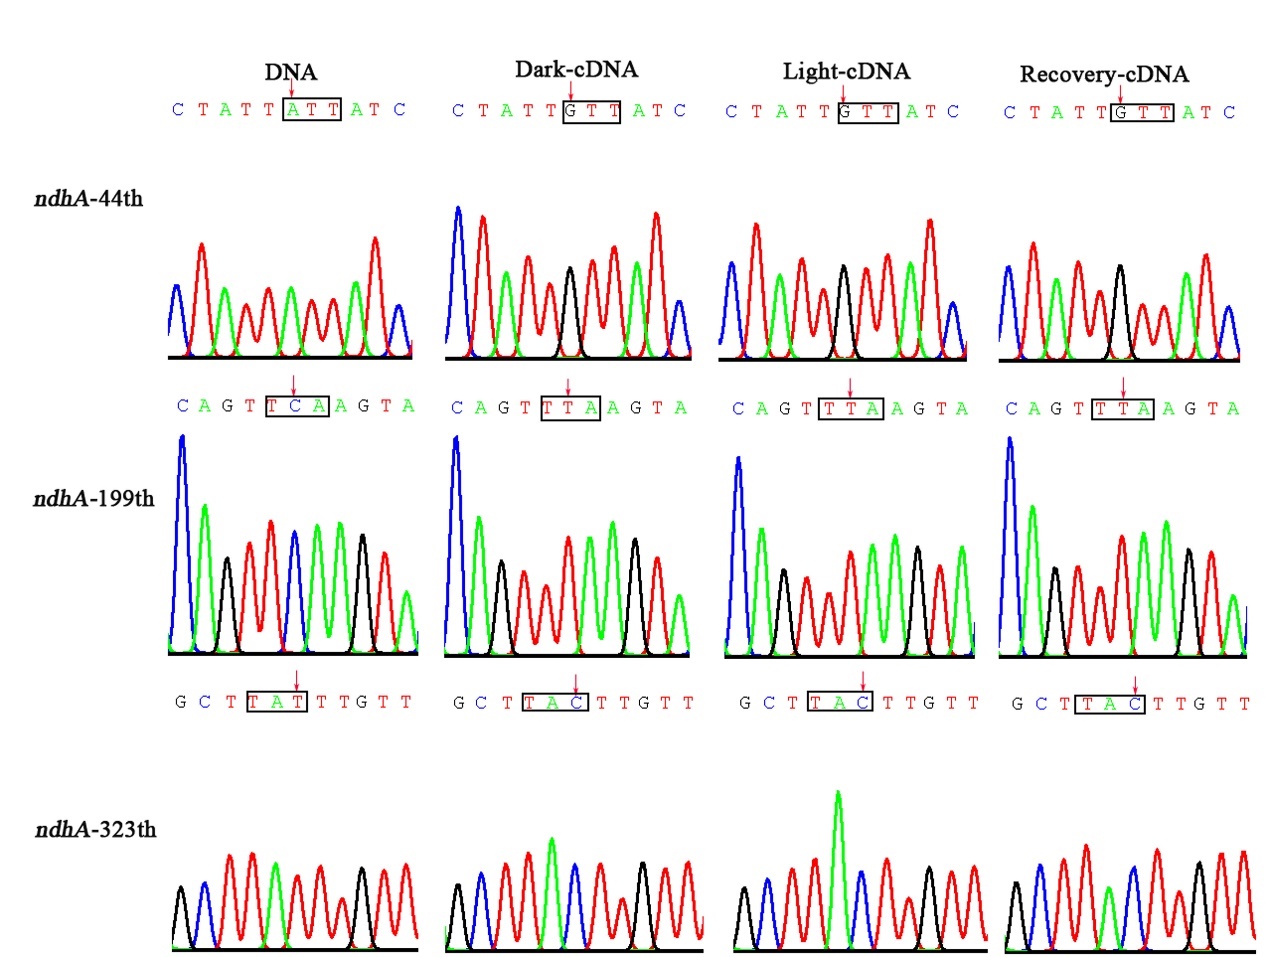


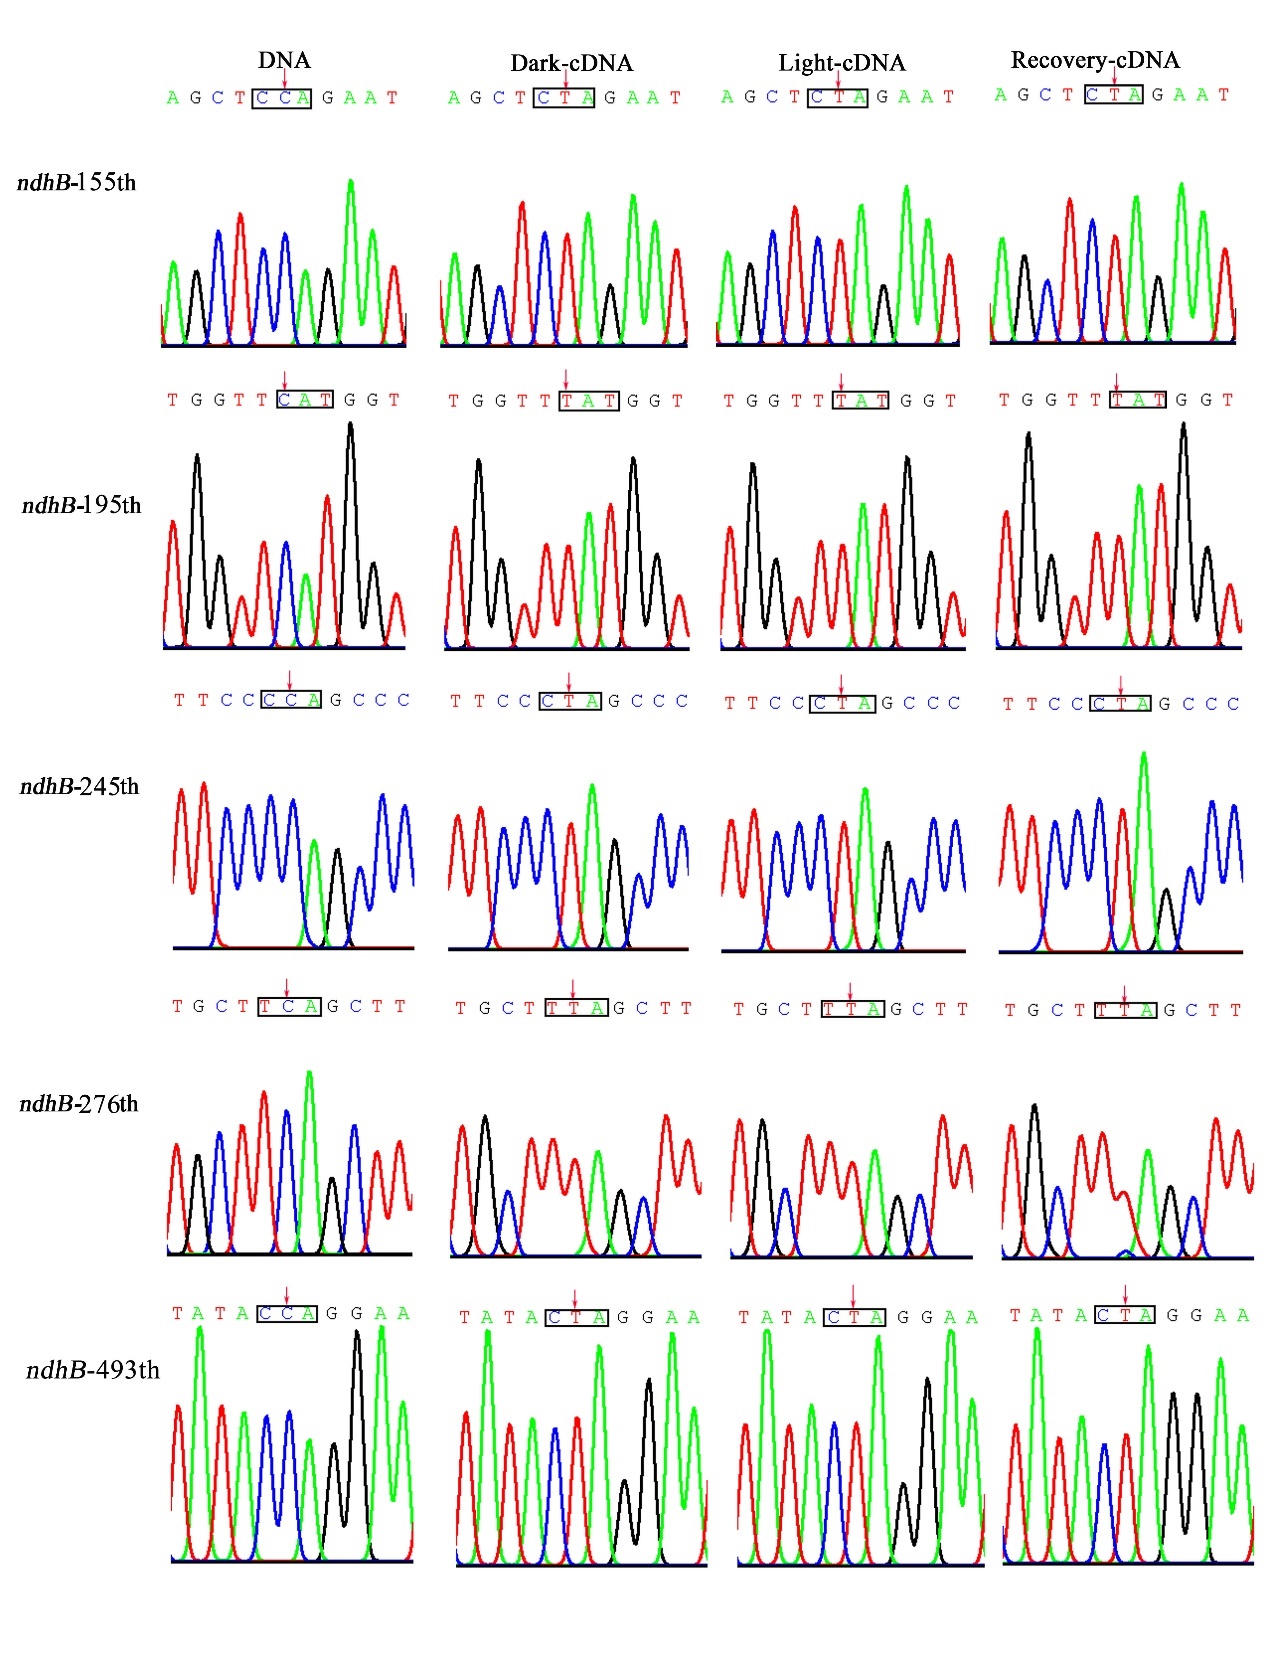


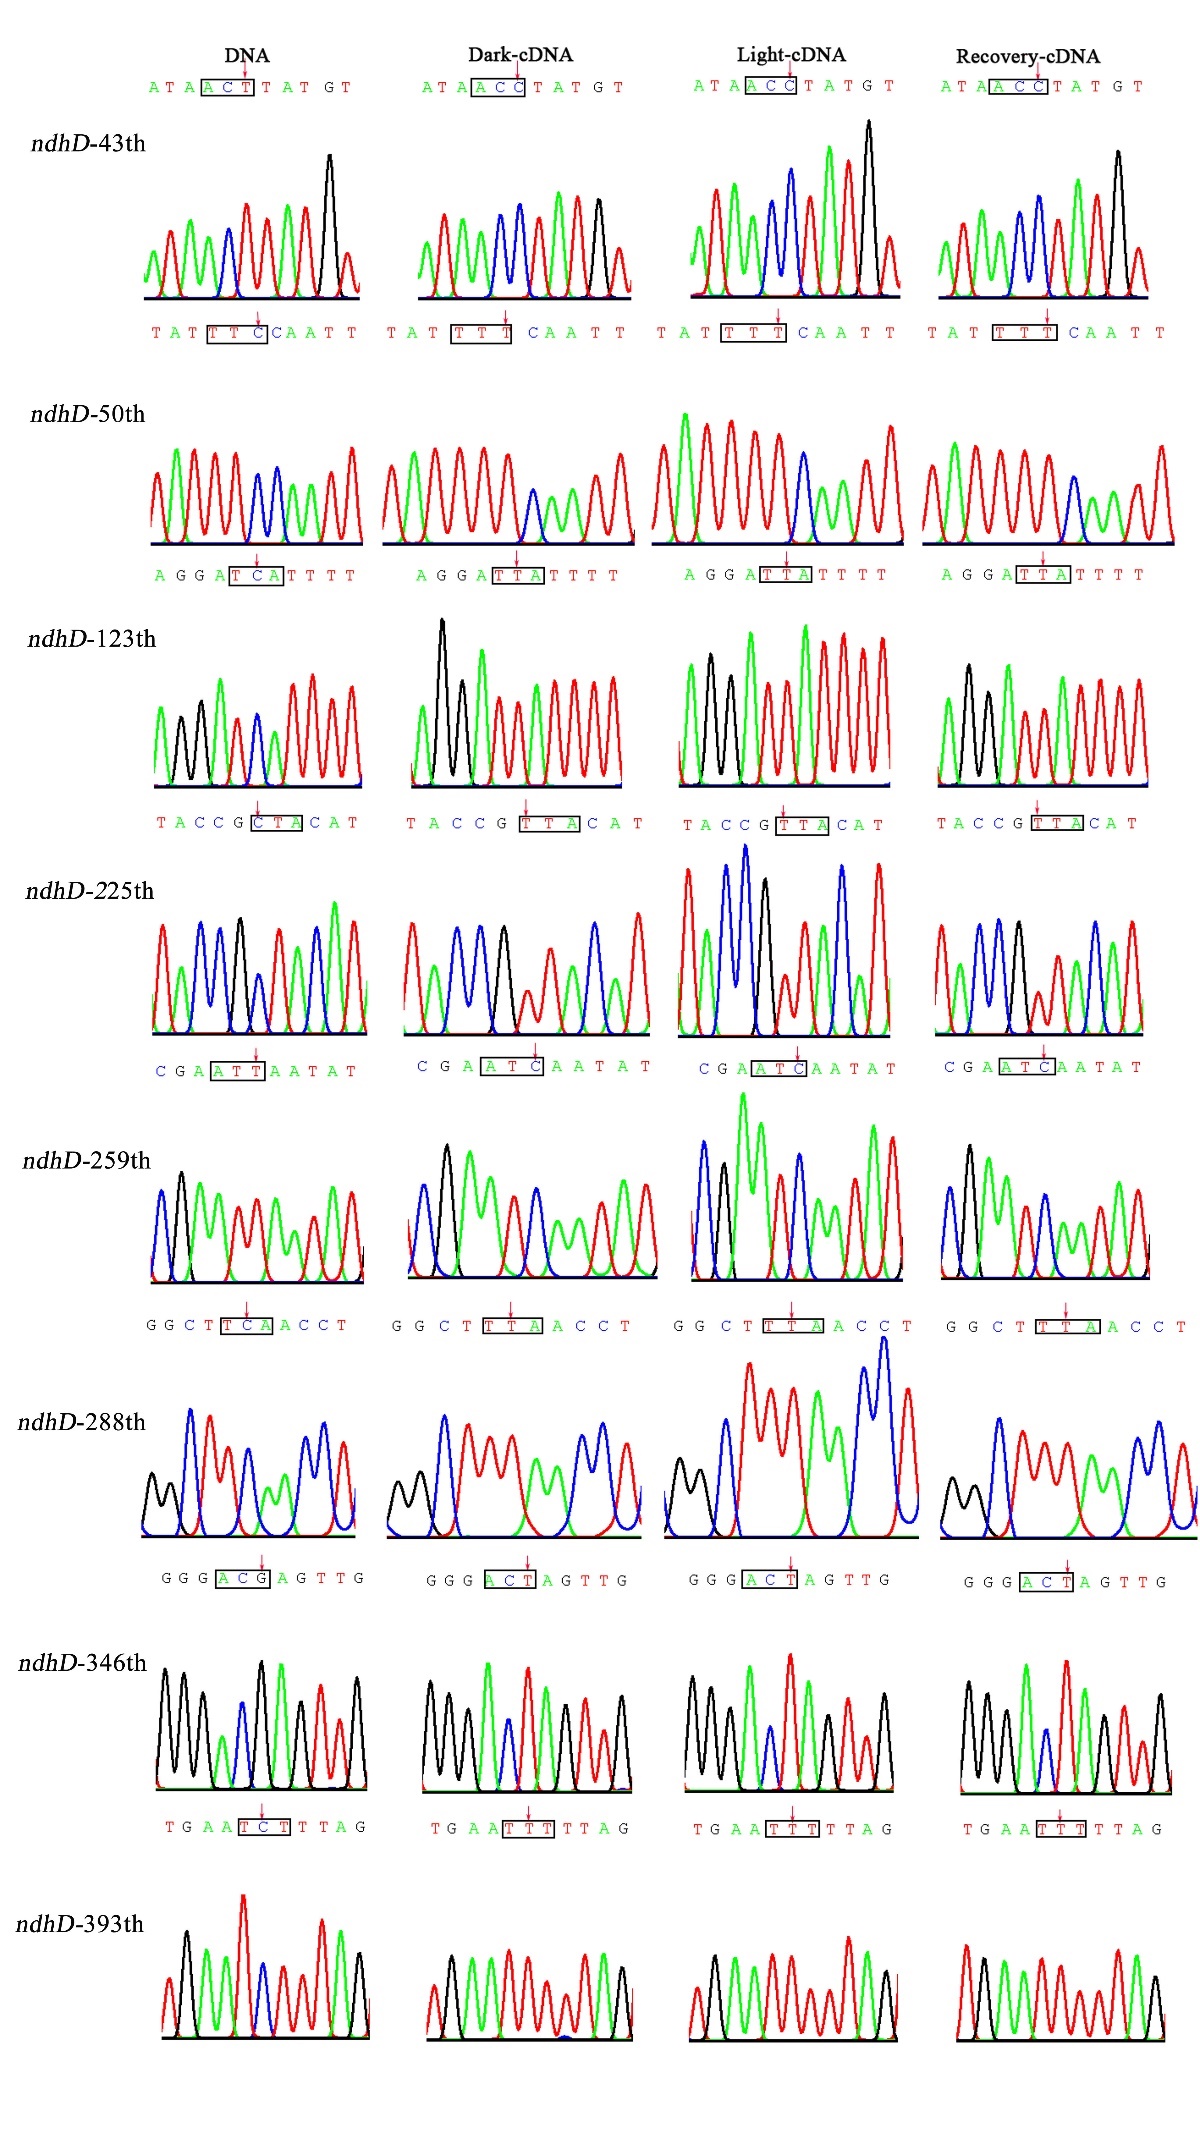


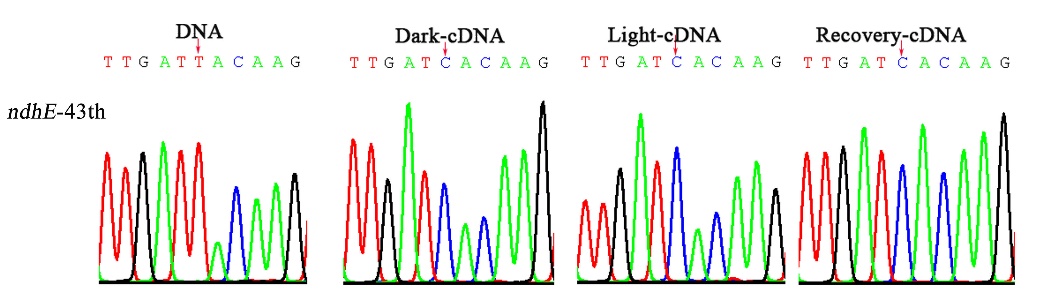


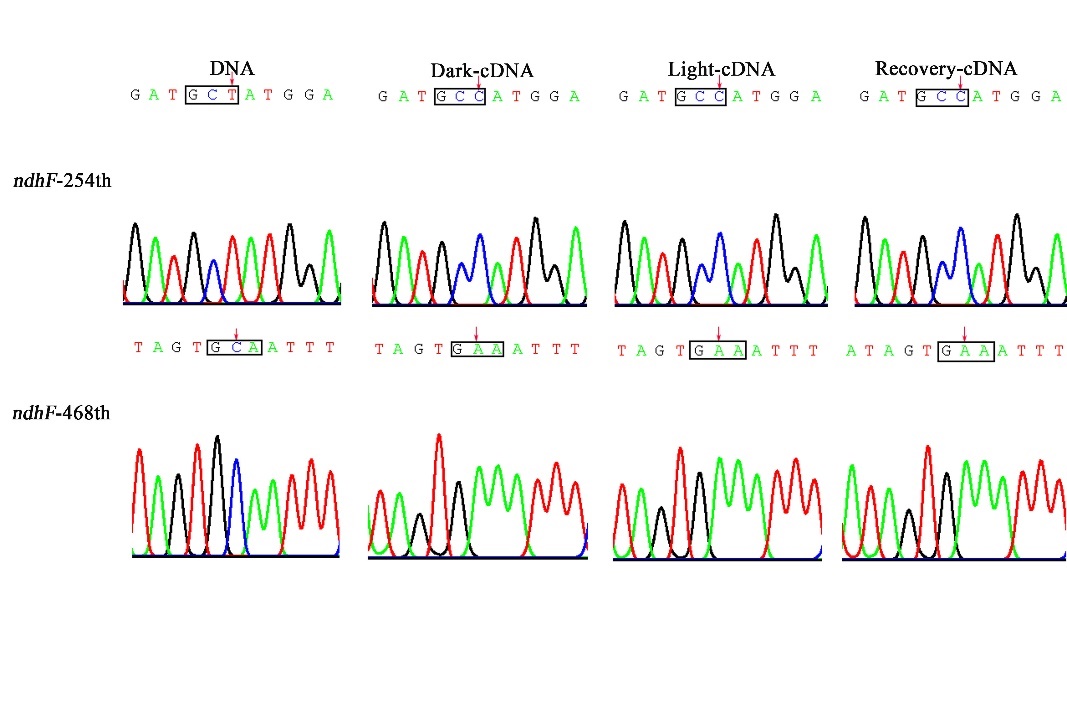


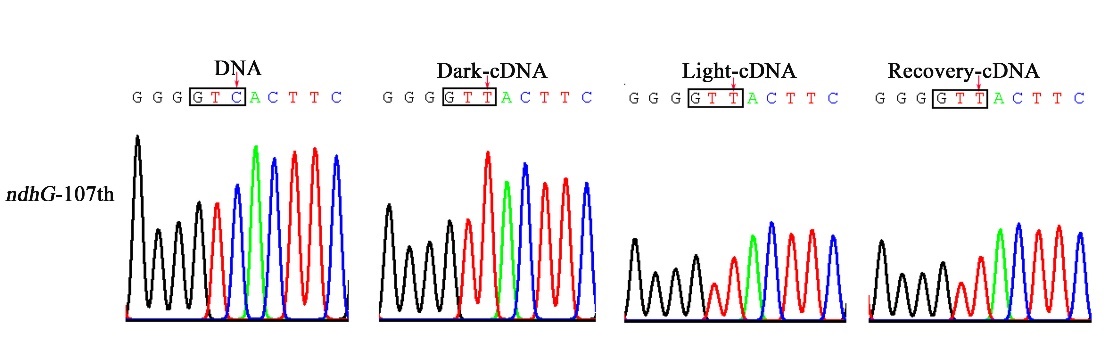


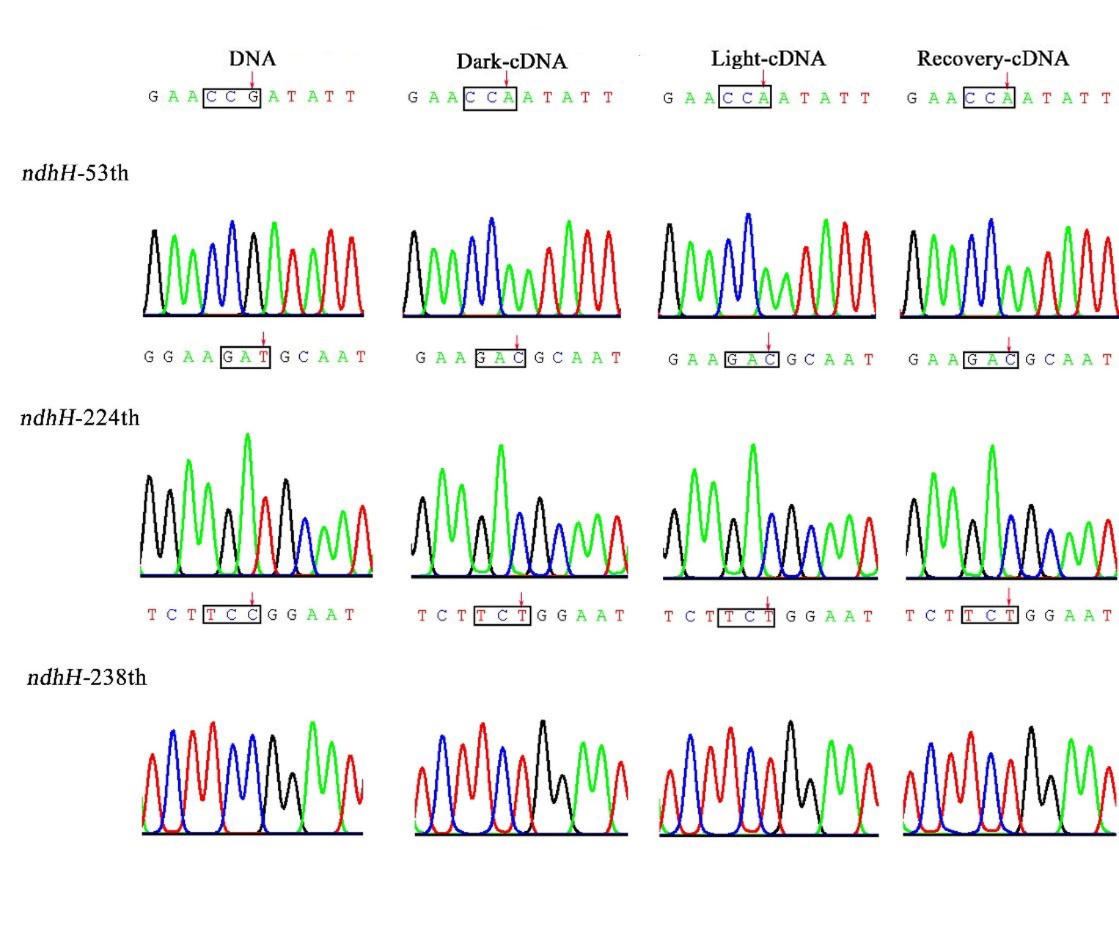

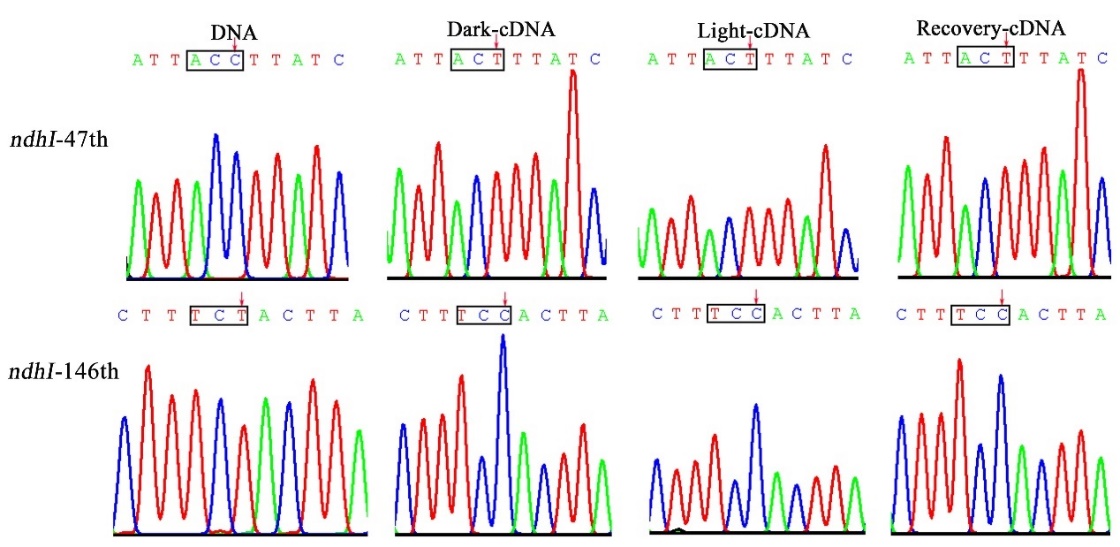

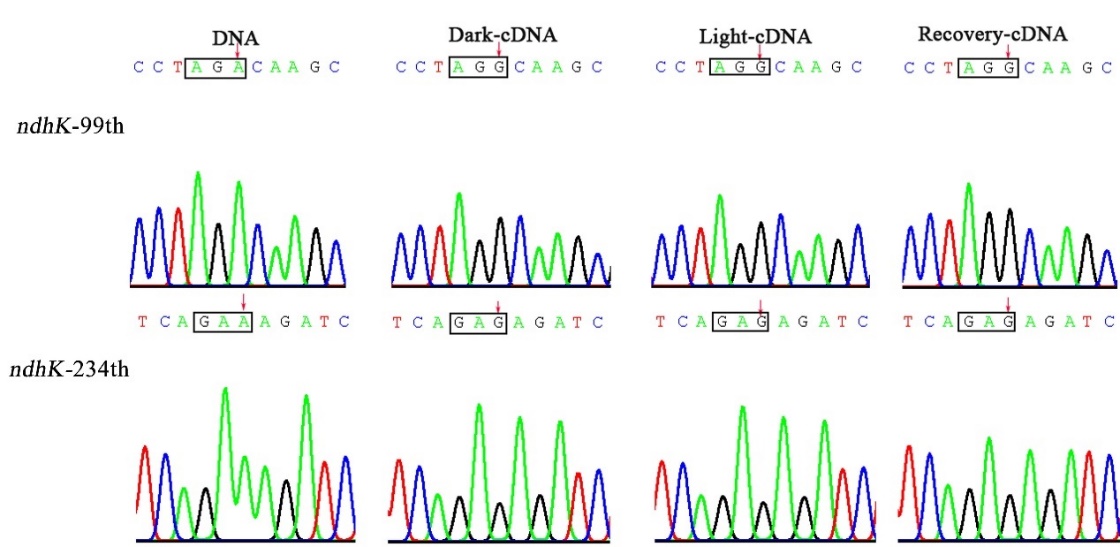


### Additional file 4: Sequencing chromatograms for all found editing sites inplastid-encoded *ndh* genes of *Z. marina*. The editing bases are indicated by arrows. The amino acids corresponding to the codons are indicated in the boxes.
